# Supplementary material for: Profiling the genetic determinants of chromatin accessibility with scalable single-cell CRISPR screens
Source: Springer Nature journal article supplement (doi:10.1038/s41587-021-00902-x), 2021-04-29
Supplement: MOESM1 [file 41587_2021_902_MOESM1_ESM.pdf]

---

**Supplementary information**

---

**Profiling the genetic determinants of  
chromatin accessibility with scalable  
single-cell CRISPR screens**

---

In the format provided by the  
authors and unedited

*Supplementary materials*

**Scalable pooled CRISPR screens with single-cell chromatin accessibility profiling**

Noa Liscovitch-Brauer<sup>1,2,4</sup>, Antonino Montalbano<sup>1,2,4</sup>, Jiale Deng<sup>1,2</sup>, Alejandro Méndez-Mancilla<sup>1,2</sup>, Hans-Hermann Wessels<sup>1,2</sup>, Nicholas G. Moss<sup>1,2</sup>, Chia-Yu Kung<sup>1,2</sup>, Akash Sookdeo<sup>1,2</sup>, Xinyi Guo<sup>1,2</sup>, Evan Geller<sup>1,2</sup>, Suma Jaini<sup>1,3</sup>, Peter Smibert<sup>1,3</sup>, Neville E. Sanjana<sup>1,2, \*</sup>

1. New York Genome Center, New York, NY, USA.
2. Department of Biology, New York University, New York, NY, USA.
3. Technology Innovation Lab, New York Genome Center, New York, NY, USA.
4. These authors contributed equally.

\* **E-mail:** [neville@sanjanalab.org](mailto:neville@sanjanalab.org)

## Supplementary tables

- Supplementary Table 1. Number of cells in each step of the CRISPR-sciATAC protocol.
- Supplementary Table 2. Sequences of oligonucleotides for CRISPR-sciATAC, CRISPR libraries and qRT-PCR.
- Supplementary Table 3. Gene and guide RNA enrichment from essentiality screen.
- Supplementary Table 4. ENCODE ChIP data sources.
- Supplementary Table 5. Histone mark differential accessibility.
- Supplementary Table 6. GO enrichment results of differential accessibility in *EZH2*-targeted cells.
- Supplementary Table 7. Transcription factor binding site differential accessibility.
- Supplementary Table 8. Cost comparison between CRISPR-sciATAC and Perturb-ATAC protocols.
- Supplementary Table 9. Time comparison between CRISPR-sciATAC and Perturb-ATAC protocols.

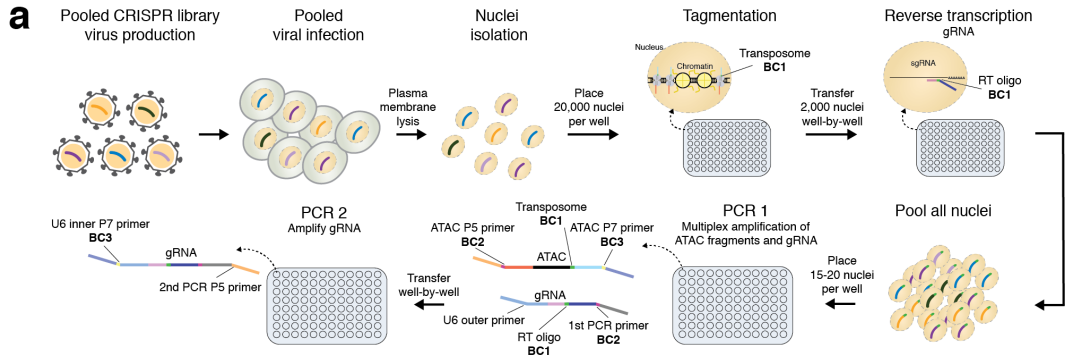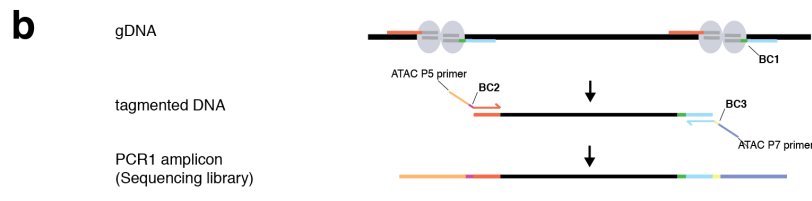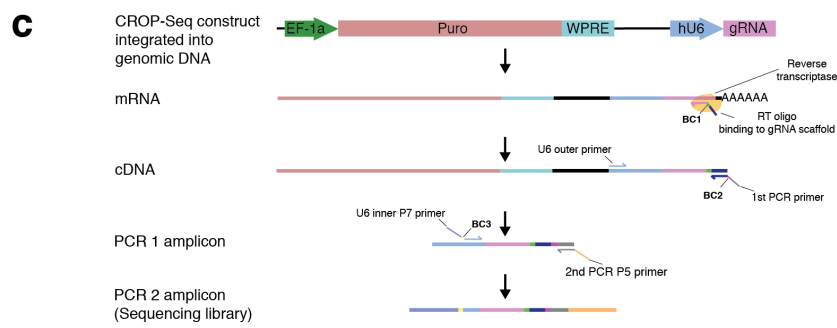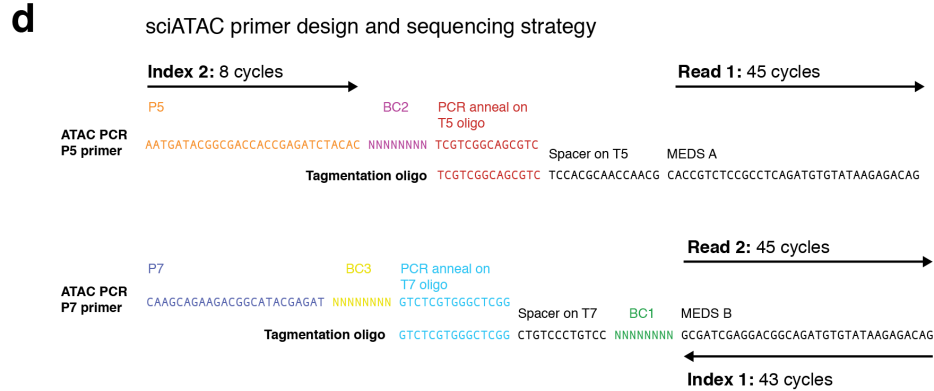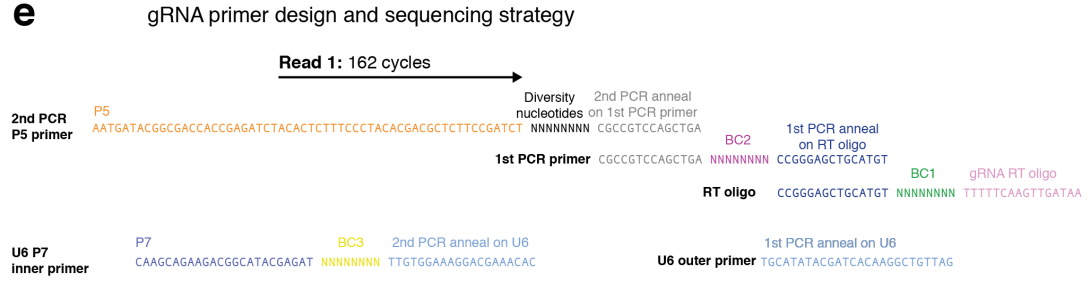

**Supplementary Figure 1. CRISPR-sciATAC library preparation and sequencing. (a)** Workflow for CRISPR-sciATAC. BC, barcode. Cell barcodes consist of a unique combination of

BC1, BC2, and BC3. **(b)** CRISPR-sciATAC schematic for ATAC-seq library preparation. **(c)** CRISPR-sciATAC schematic for guide RNA (gRNA) library preparation. **(d)** CRISPR-sciATAC primer design and sequencing strategy for ATAC fragments. **(e)** CRISPR-sciATAC primer design and library sequencing strategy for gRNA amplicons. Staggered P5 oligos were introduced in the library preparation to introduce sequence diversity. BC 1, 2, and 3 are matched for ATAC-seq and gRNA libraries, e.g. the ATAC-seq BC 1 in well A1 in the 96-well plate where tagmentation is performed is the same as the gRNA BC 1 in well A1 in the 96-well plate where reverse transcription is performed.
